# 1 Differential richness inference for 16S rRNA marker gene surveys

2 M. Senthil Kumar<sup>1,2,\*</sup>, Eric V. Slud<sup>3,4</sup>, Christine Hehny<sup>5,6,9</sup>, Lijun Zhang<sup>5,9</sup>, James Broach<sup>5,6</sup>, Rafael P. Irizarry<sup>1,2</sup>, Steven  
3 J. Schiff<sup>7,+</sup>, Joseph N. Paulson<sup>8,+,\*</sup>

4  
5 <sup>1</sup>Department of Data Science, The Dana-Farber Cancer Institute, Boston, MA

6 <sup>2</sup>Department of Biostatistics, Harvard T.H. Chan School of Public Health, Boston, MA

7 <sup>3</sup>Department of Mathematics, University of Maryland, College Park, MD

8 <sup>4</sup>Center for Statistical Research and Methodology U.S. Census Bureau, Suitland, MD

9 <sup>5</sup>Penn State Institute for Personalized Medicine, The Pennsylvania State University College of Medicine, Hershey, PA

10 <sup>6</sup>Department of Biochemistry and Molecular Biology, The Pennsylvania State University College of Medicine, Hershey,  
11 PA

12 <sup>7</sup>Department of Engineering Science and Mechanics, Pennsylvania State University, State College, PA

13 <sup>8</sup>Department of Biostatistics, Product Development, Genentech, San Francisco, CA.

14 <sup>9</sup>Contributed equally.

15 <sup>+</sup>Co-senior.

16 <sup>\*</sup>Corresponding: MSK: [senthil@ds.dfci.harvard.edu](mailto:senthil@ds.dfci.harvard.edu); JNP: [paulson.joseph@gene.com](mailto:paulson.joseph@gene.com)

17

18 Preprint server: Biorxiv, link: <https://www.biorxiv.org/content/10.1101/2021.11.07.467583v1>

19 Classification. : Physical sciences > Biophysics and Computational Biology, Biological sciences > Microbiology

20 Keywords. : richness, species misclassification, 16S microbiome, mathematical model, amplification, sequencing

21

22

23

24 **Abstract**

25 Individual and environmental health outcomes are frequently linked to changes in the diversity of  
26 associated microbial communities. This makes deriving health indicators based on microbiome  
27 diversity measures essential.

28  
29 While microbiome data generated using high throughput 16S rRNA marker gene surveys are  
30 appealing for this purpose, 16S surveys also generate a plethora of spurious microbial taxa. When  
31 this artificial inflation in the observed number of taxa (i.e., richness, a diversity measure) is  
32 ignored, we find that changes in the abundance of detected taxa confound current methods for  
33 inferring differences in richness.

34  
35 Here we argue that the evidence of our own experiments, theory guided exploratory data analyses  
36 and existing literature, support the conclusion that most sub-genus discoveries are spurious  
37 artifacts of clustering 16S sequencing reads. We proceed based on this finding to model a 16S  
38 survey's systematic patterns of sub-genus taxa generation as a function of genus abundance to  
39 derive a robust control for false taxa accumulation.

40  
41 Such controls unlock classical regression approaches for highly flexible differential richness  
42 inference at various levels of the surveyed microbial assemblage: from sample groups to specific  
43 taxa collections. The proposed methodology for differential richness inference is available through  
44 an R package, *Prokounter*.

45  
46 Package availability: <https://github.com/mskb01/prokounter>

## 47 1. Introduction

48 Clinically relevant health outcomes are often accompanied by changes in the diversity of  
49 associated microbial communities. For instance, decreased gut microbiome diversity  
50 accompanies childhood diarrhea<sup>1</sup>, enteric infections<sup>2</sup>, and has been shown to predict the onset of  
51 infant type I diabetes<sup>3</sup>. Distinct intra-tumoral microbial diversity levels are associated with cancer  
52 sub-types<sup>4-6</sup>. Thus, inferring disease associated changes in microbiome diversity metrics is useful  
53 for characterizing disease pathology and progression.

54 Among the various diversity measures, *richness* quantifies the number of taxonomic groups in a  
55 community<sup>7,8</sup>. Changes in species richness of biological communities have informed key  
56 environmental management practices that are relevant to public health and well-being<sup>7-23</sup>. Of the  
57 technologies available for characterizing microbial communities, 16S rRNA gene surveys are  
58 widely adopted for their high throughput and low cost. As a broad screening tool, they largely  
59 avoid the need for laborious culturing of microbes. This makes them especially attractive for  
60 deriving health metrics based on the microbiome.

61 In this work, we focus on inferring changes in richness of microbial communities between sample  
62 groups (i.e., differential richness) with 16S survey data.

63 To infer differential richness, one first estimates richness for the specific communities of interest  
64 in each survey sample. The estimated values are then compared between sample groups with  
65 either fixed or mixed effects models, or with non-parametric statistical tests, possibly adjusting for  
66 sampling effort<sup>24-27</sup>. There are two types of sample-level estimates of richness. *Observed* richness  
67 refers to the number of taxa observed in a sample. *Asymptotic* richness is obtained by adding an  
68 estimate of the number of unobserved taxa to the number of observed taxa. Approaches to  
69 estimate asymptotic richness vary, but often assume that relatively uncommon taxa are the most  
70 informative<sup>28</sup>. Both types of richness estimates enable valid comparisons among *macro-*  
71 *ecological communities*<sup>24,25,28-30</sup>.

72 However, direct application of the aforementioned richness estimates and comparisons to 16S  
73 microbiome data would ignore the plethora of uncommon and spurious taxa that inflate observed  
74 richness estimates in 16S survey data<sup>27,31-34</sup>. When this artificial inflation in observed richness is  
75 ignored, we find that differential abundance of detected taxa confounds current methods for  
76 differential richness inference. The problem is severe when between-sample richness  
77 comparisons are made at lower taxonomic levels, e.g., genus. Thus, direct application of classical  
78 methods to microbiome differential richness inference is unreliable.

79 Attempts to overcome sequencing noise have been made. Chiu & Chao<sup>35</sup>, noting that singleton  
80 taxa are highly susceptible to sequencing noise, establish an improved estimator for undetected  
81 richness by relying on more abundant taxa (also see Willis<sup>36</sup>). However, the estimator is often  
82 numerically undefined at lower levels of the taxonomy, and still takes observed richness at face  
83 value.

84 Our results indicate that the observed frequencies of spurious taxa are determined by the output  
85 abundances of input sequences, and thus need not be restricted to singleton frequencies alone.

86 We therefore aimed to develop a flexible differential richness inference procedure for 16S  
87 microbiome surveys — one that would not only allow investigators to seek sample-wide richness  
88 changes across experimental groups (as is commonly done in modern metagenomics), but also  
89 within genera or taxa collections of any particular interest, while accounting for false taxa  
90 accumulations.

91 The paper is divided into several sections. Section 2.1, based on our own experiments and  
92 exploratory data analyses guided by theory, presents multiple lines of evidence supporting the  
93 view that most sub-genus taxa currently identified in 16S surveys are spurious. This allows us to  
94 exploit within-genus taxa accumulation data to derive a robust control for false taxa accumulations  
95 (Methods section). Section 2.2 illustrates the confounded differential richness inferences arising  
96 from current methods, when detected taxa exhibit a net non-zero relative abundance fold change  
97 between sample-groups. Section 2.3 applies the proposed procedure (*Prokounter*) to a variety of  
98 datasets and illustrates the value that differential richness inferences at lower taxonomic levels  
99 add to clinical and public health related microbiome data analyses. For example, application of  
100 *Prokounter* to a gut microbiome survey of a traveling individual<sup>2</sup> identifies invading genera with  
101 increased richness in member taxa, during and after an enteric infection.

## 102 2. Results

### 103 2.1 Most sub-genus taxa in 16S surveys are likely technical artifacts

104 16S surveys reconstruct target microbial populations by clustering sequencing reads. Spurious  
105 microbial taxa occur when the clustering procedure's error model fails to capture the entirety of  
106 sequence variation induced by the technical steps in 16S sequencing. These steps include, but  
107 are not limited to, PCR amplification of 16S material and sequencing (Fig. 1A).

108 To identify the major parameters underlying false taxa accumulations, we mathematically model  
109 the nucleotide substitution errors introduced by a chain of PCR amplification and sequencing  
110 processes allowing for back mutations (Supplementary Note 1). Under reasonable assumptions,  
111 we find that the rate of falsely classifying an error variant of a source sequence (type I error) using  
112 a priori fixed sequence similarity thresholds, strongly increases with the source sequence's  
113 recovered (i.e., output) abundance. The average recovered abundance is multiplicative in the  
114 source sequence's apparent input abundance and the total sampling depth (Supplementary Note  
115 1). Thus, false sequence clustering decisions, and hence the resulting false clusters, increasingly  
116 accumulate with the true source sequence's recovered abundance, and not necessarily sample  
117 depth. We therefore identify a mechanism through which spurious clusters of sequences are  
118 increasingly identified as microbial taxa, regardless of the underlying biological reality.

119 Given the empirical observation that 16S genetic segments are mostly limited in resolution to  
120 prokaryotic genera<sup>37-44</sup>, we explored within-genus taxa accumulations (i.e., the number of  
121 detected sub-genus taxa as a function of recovered genus abundances), in several publicly  
122 available 16S surveys. In general, we expect genera to vary in their true richness and the relative  
123 abundances of member taxa. This must accordingly induce biological variation in the genus-  
124 specific taxa accumulation patterns. However, this expectation did not broadly hold in the several  
125 microbiome surveys analyzed here. Within-genus taxa accumulation patterns were highly  
126 concordant for several genera within study (Fig. 2A, Fig. S1-S3). Relative to the number of  
127 detected genera, which ranged from 60-400 across studies, a clustering analysis indicates that  
128 within-genus taxa accumulation data supports only 2-8 distinct accumulation patterns in each  
129 study (Table. S1). Multiple dominant genera can be clustered to the same accumulation pattern.  
130 In addition, relative to study specific covariates, a robust trend estimate of the within-genus taxa  
131 accumulation data explains the bulk of the variation in genus-specific and sample-wide taxa  
132 accumulations (Tables 1-2) in each study. Similar qualitative conclusions follow when genus  
133 recovered abundance is used as a predictor, instead of an estimated trend (Tables S2-S3).  
134 Finally, these qualitative and quantitative attributes of the accumulation patterns were obtained  
135 regardless of the 16S clustering approach used (Tables 1-2). These results indicate a strong  
136 within-study regularity in observed taxa accumulations across genera and sample groups - as if  
137 most genera have similar taxa richness and evenness - suggesting a likely technical origin.

138 **Single colony experiment** To further verify these conclusions, we conducted a 16S sequencing  
139 experiment on a target *Pseudomonas aeruginosa* population. The experimental sample was by  
140 itself overnight derived from a single *P. aeruginosa* colony (Supplementary Note 1). In a series of  
141 experimental samples, we varied both the input abundance of *Pseudomonas* cells and the PCR

142 amplification cycles. Our mathematical model (Supplementary Note 1), which tracked the  
143 probability distribution of cell division induced nucleotide substitutions over generations, indicates  
144 that under no selection pressure, we can expect one biological 16S genotype in our input. An  
145 upper bound on the number of our input taxa is given by the number of 16S genes generally found  
146 within the *Pseudomonas* genus (~ 4), times two for taxa clusters corresponding to forward and  
147 reverse complement strands. What we found was a rather different representation, rich with low  
148 abundant and poorly replicating taxa: the total numbers of observed *Pseudomonas* taxa were  
149 1050 and 300 for clustering methods based on sequence similarity with respective thresholds of  
150 99% and 97%. The bulk of the newly identified *Pseudomonas* taxa preferentially contributed to  
151 the low frequency regime of the taxa abundance histogram (Fig. S4), suggesting that they are  
152 likely clusters of rare, erroneous 16S sequencing reads generated during amplification and  
153 sequencing. Notably, taxa within-*Pseudomonas*, despite having a noisy occurrence with respect  
154 to amplification cycles and input cells (Fig. 3A), accumulated along the *Pseudomonas* genus  
155 recovered abundance axis in a clear, robust fashion (Fig. 3B). As expected, the stricter the  
156 sequence similarity threshold, the stronger the rate of taxa accumulations along the recovered  
157 abundance axis (Fig. 3B). Furthermore, taxa accumulations from several detected genera  
158 followed quantitatively similar patterns (Fig. 3C, Tables 1-2). From prior experiments in our  
159 laboratory and from control samples, we know *Pseudomonas* lab contaminants have very weak  
160 relative abundances. Restricting the above analysis to only those *Pseudomonas* taxa that track  
161 input cells, does not change the aforementioned conclusions qualitatively (Fig. S5).

162 Similar results on taxa accumulation patterns were also obtained for the *multiple*-genera Oral and  
163 Gut mock communities of the microbiome quality control project, handling lab B (MBQC<sup>27</sup>).

164 Because true taxa are expected to replicate across study samples, we next explored sub-genus  
165 taxa occurrence rates (Fig. S19). In all studies, we find that over 50% of sub-genus taxa in over  
166 50% of the detected genera did not replicate in more than 10% of the samples. Mock experimental  
167 communities are expected to represent a greater degree of homogeneity than real world  
168 communities as the latter may contain rare variants. Restricting analysis to experimental  
169 communities with single- and multiple- mock genera, we find that in eight out of nine datasets,  
170 over 50% of sub-genus taxa in over 50% of the mock genera replicated in less than 50% of the  
171 samples (Fig. S19). These results indicate poor within-study replicability of most sub-genus taxa.

172 Finally, because we expect true taxa richness and evenness to vary along the taxonomic tree, we  
173 explored taxa accumulations for the various taxonomic levels (i.e., family, order, class and  
174 phylum) in each study. Remarkably, the total number of observed taxa at any level of the  
175 taxonomic tree, was strongly predicted by recovered abundance alone and was not dependent  
176 on the taxonomic level considered (Fig. 2A, Fig. S20). These results indicate a strong regularity  
177 in taxa accumulations across taxonomic levels.

178 Taken together, our results indicate that most sub-genus taxa in 16S surveys are likely spurious.

179

## 180 **2.2 Spurious taxa confound differential richness inference**

181 That observed spurious sub-genus taxa increasingly accumulate with genus recovered  
182 abundances leaves us with two expectations.

183 First, without appropriate corrections, inferring differences in a genus' number of associated taxa  
184 (i.e., genus-wise differential richness) are highly likely to be confounded by the genus's respective  
185 difference in the recovered abundances (differential abundance). We observe that estimated  
186 genus-wise richness values from asymptotic estimators grew systematically with the genus-  
187 specific recovered abundances (Fig. S6). In addition to observed richness, estimates of  
188 unobserved richness can exhibit similar behavior (Fig. S7). This in turn induces an artifactual  
189 positive correlation between the resulting genus-wise differential richness fold changes and the  
190 genus-wise differential abundance fold changes (Fig. 2B, S8).

191 Second, inferring differential richness between sample-groups (i.e., sample-wide differential  
192 richness) are highly likely to be confounded by a net non-zero relative abundance fold change of  
193 detected genera. Straightforward simulations where spurious taxa are generated in an abundance  
194 dependent fashion illustrate this behavior (Fig. S6). Interestingly, illustrative examples of the same  
195 were rare in several 16S surveys, suggesting that spurious taxa accumulations are comparable  
196 at the sample-level. Indeed, in many datasets, the relative abundance log fold changes of member  
197 genera were symmetric and concentrated around zero (Figs. S9-S10). Nevertheless, exceptions  
198 with asymmetric relative abundance log fold change distributions exist and a case in point is  
199 offered by the long-term time series study discussed below (Fig. S11).

200 In Supplementary note 2, we model the abundance dependent generation of spurious taxa in 16S  
201 surveys within the sample theoretic framework of Chao<sup>29</sup> and Harris<sup>45</sup> and find that the above  
202 observations agree with theory.

## 203 **2.3 Prokounter enables flexible differential richness inference**

204 To overcome the aforementioned biases when applying current richness estimators to 16S  
205 surveys and to establish a flexible differential richness inference approach, we developed  
206 *Prokounter* and applied it to several microbial communities including those from a long-term time  
207 series study, hydrocephalus cohort, waste-water treatment plant and our pseudomonas dilution  
208 experiment.

209 While zero-truncated statistical models offer one route to modeling member inclusions in a  
210 population survey, the same can be achieved by incorporating appropriate predictors in a  
211 regression context<sup>46</sup>. The former is the approach taken by some classical richness estimators to  
212 model species abundance<sup>28,47</sup>. We take the latter view and proceed as follows. Based on the  
213 results from section 2.1, we assume that most sub-genus taxa in 16S surveys are false. This  
214 allows us to exploit a 16S survey's overall sub-genus taxa accumulation trend, along with any  
215 systematic genus-specific effects, as a sampling effort dependent control for false taxa  
216 accumulation (Methods). This control is exploited within standard regression methods for  
217 differential richness inference.

218 With a few 16S surveys, we illustrate the insights offered by the proposed procedure, *Prokounter*,  
219 in achieving genus-specific and sample-wide differential richness inferences.

220 Unlike other estimators analyzed here (Chao<sup>129</sup>, ACE<sup>48</sup> and Breakaway<sup>49</sup>), the uncorrelatedness  
221 of Prokounter's richness statistics with genus-wide differential abundance statistics is clear in  
222 each dataset (Fig. 2B,C, Fig. S12). Breakaway's estimates were the most variable, often  
223 accompanied by wide confidence intervals. On several occasions, genus-specific differential  
224 richness estimates were not well defined in numerical value when using current richness  
225 estimators for numerical, and not necessarily statistical identifiability reasons. Sample-wide  
226 inferences agreed among all methods in most cases, except when detected genera exhibited a  
227 net non-zero relative abundance fold change distribution.

228 In all surveys below, asymptotic genus-wise and sample-wide richness estimates heavily tracked  
229 their respective observed richness values (97-100% Pearson correlations, Figs. S13-S17).

230 Long-term time series study Based on a clustering analysis of abundance profiles, David et al.,<sup>2</sup>  
231 identified that a distinct sub-group of the phyla *Firmicutes* replaced another *Firmicutes* sub-group,  
232 post-enteric infection, in the gut microbiome of an individual relocating to a different country.  
233 Prokounter refines this result further by identifying several *Firmicutes* genera (*Faecalibacterium*,  
234 *[Ruminococcus]*, *Oscillospora*) that are less rich post-infection. On the other hand, *Dorea* and  
235 *Coprobacillus*, members of *Firmicutes*, were found to have significantly increased richness in  
236 infection and post-infection samples. The genus *Acinetobacter* from the phylum *Tenericutes* was  
237 found to have significantly higher richness in samples collected during infection, while this was  
238 not the case post-infection. Thus, differential richness adds another state variable to the  
239 microbiome state specifications of the original study.

240 In David et al's dataset, sample-wide inferences disagreed among the methods compared.  
241 Prokounter produced negative richness inferences for both infection and post-infection samples  
242 consistent with antibiotic exposure. Chao1/Betta and ACE/Betta indicated reduced richness post-  
243 infection with a relatively weak significance for reduced richness in infection samples.  
244 Breakaway/Betta failed to reject any of the corresponding null hypotheses (p-value=0.99 infection  
245 and p-value=0.74 post-infection), potentially owing to the very high variability of Breakaway  
246 estimates. As established in the previous subsection, these differences in inferences likely stem  
247 from the asymmetric differential abundance of detected genera in the samples collected during  
248 infection.

249 Pathogenesis We applied Prokounter to a 16S survey of the cerebrospinal fluid from  
250 hydrocephalus children hypothesized to have infectious (PIH) and non-infectious (NPIH) origins<sup>50</sup>.  
251 We intuitively expected, and observed, that the cerebrospinal fluid enveloping the central nervous  
252 system to register lower richness compared to laboratory controls. PIH samples had relatively  
253 lower richness compared to clinical control samples.

254 A genus that is positively differentially abundant, along with a negative differential richness  
255 estimate might indicate invasion of a sub-species. Genus-specific differential richness inference  
256 with Prokounter yields two genera as having lowered richness in the PIH samples: *Paenibacillus*



257 and *Streptococcus. Paenibacillus* was the dominant pathogenic genus identified with the PIH  
258 phenotype using 16S data<sup>50</sup>.

259 Waste-water treatment To demonstrate an ecological monitoring application, we applied  
260 Prokounter to 16S data arising from a waste-water treatment plant<sup>51</sup>. The method indicates that  
261 relative to the effluent, sample groups from each of the post-treatment stages have significant  
262 negative microbial richnesses. These results readily agree with our expectation of a publicly  
263 implemented waste water treatment protocol. Chao1/Betta, ACE/Betta produced similar results.  
264 Breakaway/Betta failed to reject the null for sample groups corresponding to effluent ( $p=.065$ ) and  
265 inlet to pumphouse ( $p=.692$ ).

266 Using differential abundance analysis, the original study highlighted the persistence of *Legionella*  
267 and *Mycobacterium* in post-treatment samples calling into question the efficacy of the treatment  
268 process. Performing genus-specific differential richness analysis with Prokounter indicates that  
269 the treatment plant reduces the richness associated with several types including *Mycobacterium*.  
270 We did not detect *Legionella* as reduced in richness in the effluent. These results indicate that  
271 waste-water treatment has been effective with removing *Mycobacterium* sub-types.

272 Pseudomonas dilution study The Pseudomonas dilution experiment varied two parameters of a  
273 16S experimental pipeline: amplification cycles, and input cells of a single colony derived  
274 microbial population.

275 Increased amplification cycles can allow increased sampling of both contaminant and input  
276 genera. Thus, within further sampling constraints imposed by the multiplexed nature of the  
277 experiment, we expect sample-wide richness to grow with amplification cycles. Sample-wide  
278 differential richness inference from all methods matched this expectation.

279 It is well known that the abundance of lab contaminants falls with input loads [34]. If the dynamic  
280 range in input loads is sufficiently high, we can expect inferred sample-wide richness to fall with  
281 input Pseudomonas cells. Results from Prokounter, Chao1/Betta and ACE/Betta matched this  
282 expectation. Breakaway/Betta failed to reject the corresponding null hypotheses ( $p=0.4$ ).

283 The genus of principal interest in this experiment is Pseudomonas. The genus-wide differential  
284 richness results from Prokounter indicated a decrease in richness with respect to input cells and  
285 an increase with respect to amplification cycles. This is in line with our expectations as we expect  
286 the detection rate of lab contaminant Pseudomonas species to grow with amplification cycles,  
287 and fall with input Pseudomonas loads. In direct contrast, Chao1/Betta and ACE/Betta,  
288 confounded by input Pseudomonas's increasing abundance, indicated a Pseudomonas richness  
289 increase with input cells ( $p=0$  for both), and Breakaway/Betta failed to reject ( $p=0.251$ ).

### 290 3. Discussion

291  
292 **Summary:** 16S microbiome surveys reconstruct target microbial populations by clustering  
293 sequencing reads. Spurious microbial taxa occur when the clustering procedure's error model  
294 fails to capture the entirety of sequence variation induced by the technical steps in 16S  
295 sequencing (Supplementary Note 1, Fig. 1A). We have shown that the false taxa thus generated  
296 not only inflates the estimate of a (microbial) community's richness (Supplementary Note 2, Fig.  
297 S6), but they also cause taxa differential abundance to confound differential richness inferences  
298 (Fig. 2B, S8). This occurs because every false taxon is generated through errors from one or a  
299 few true (i.e., input) taxa, and hence, their rates of production increase with the output abundance  
300 of the corresponding source taxa (Supplementary Note 1). Based on our result that most sub-  
301 genus discoveries are likely false (Section 2.1), we have established abundance dependent  
302 controls for false taxa accumulations using a given survey's within-genus taxa accumulation data  
303 (Methods, Fig.2C, S2, S18). We have shown that our strategy overcomes the confounding  
304 problem (Fig. 2C, S12). And we have illustrated the utility of differential richness inferences in  
305 individual and public health related microbiome data analyses (Section 2.3).

306  
307 **Assumption:** Our approach assumes that most sub-genus taxa in 16S surveys are spurious and  
308 are poor representatives of the underlying microbial community. We have provided several lines  
309 of evidence to support this conclusion: First, our mock experiment of an overnight derived  
310 microbial population indicated that observed richness can be severely inflated (Fig. 3, S5). Our  
311 expectation was set in part by a mathematical model of cellular reproduction, where we tracked  
312 the probability distribution over substitutions, over generations (Supplementary Note 1). Second,  
313 in a manner similar to what we would expect of low probability errors, most sub-genus taxa in  
314 both controlled mock and real world datasets are rare and show poor replicability across samples  
315 (Fig. S19). Third, within-genus taxa accumulation patterns in several publicly available datasets,  
316 including those from single- and multi-genera mock experiments, appear remarkably regular as if  
317 most genera in 16S surveys have similar richness and taxa evenness (Fig. 2-3, S1-S3, Tables 1-  
318 2, S2-S3). Fourth, the total number of taxa observed for any taxonomic level was strongly  
319 determined by the category's recovered abundance alone and was not dependent on the level  
320 itself (Fig. 2, S20). Finally, the literature offers abundant support for abundance dependent false  
321 taxa generation in 16S surveys, of which we note a closely related few. Kunin et al.,<sup>32</sup> demonstrate  
322 the large number of false *Escherichia* taxa that arise in a 16S survey of a target *E.coli* population  
323 (also see Degnan and Ochman<sup>52</sup>, Pinto and Raskin<sup>53</sup>). Based on the empirical observation that  
324 the number of false taxa generated are sampling effort dependent, Schloss et al.,<sup>54</sup> recommend  
325 that community-level comparisons be made at comparable sampling depths. Haas et al.,<sup>55</sup>  
326 illustrate the predictable, abundance dependent generation of false chimeric taxa within genera  
327 in mock communities.

328  
329 **Implications for richness theory and automated ecological surveys:** False microbial taxa in  
330 16S surveys arise because automated procedures to reconstruct taxa misclassify sequencing  
331 reads from their true types. In Supplementary Note 1, we analyzed the influence of amplification  
332 and sequencing induced substitutions in causing misclassifications (also see Schloss<sup>56</sup>, and Sze  
333 and Schloss<sup>57</sup>). In Supplementary Note 2, we mathematically modeled the false taxa that arise

334 through misclassification and showed in part that a traditional asymptotic richness estimator  
335 (Chao1<sup>29</sup>) is biased under this more general sampling scenario. The severity of bias is determined  
336 by sampling parameters. Together with the results mentioned in the previous paragraphs, we  
337 conclude that classical richness theory, which predominantly focuses on estimating undetected  
338 richness while assuming observed richness at face value, should be generalized for observed  
339 species misclassifications in modern high throughput and highly automated surveys.

340  
341 **Asymptotic richness estimators track observed richness values in 16S surveys:** In the  
342 several 16S surveys considered here, asymptotic richness estimates tracked observed richness  
343 values both sample-wide and at within-genera levels (Fig. S13-S17). Our mathematical models  
344 and simulations that incorporate false taxa accumulations within the sampling theoretic framework  
345 of Chao<sup>29</sup> and Harris<sup>45</sup> indicate that such tracking can arise when the apparent richness (i.e, the  
346 true plus false richness) and not necessarily true richness, is undersampled in a survey  
347 (Supplementary Note 2). This explains the observed tracking in the *Pseudomonas* genus in the  
348 *Pseudomonas* dilution experiment, where we do not expect undersampling of the true  
349 *Pseudomonas* community (Fig. S13).

350  
351 **False discovery control in differential richness analysis, confounding with differential**  
352 **abundance:** Hughes et al.,<sup>58</sup> argue that traditional macroecological richness estimators continue  
353 to enable robust sample-wide richness comparisons in 16S surveys. Our analysis identifies  
354 exceptions (Section 2.3, Long-term time series study) and clarifies the practical conditions under  
355 which controlling for spurious discoveries become important. In particular, we find that false taxa  
356 accumulations cause abundance dependent inflation in observed taxa numbers and their  
357 frequencies (Supplementary Note 1, 2), causing differential (relative) abundances of detected  
358 taxa to confound differential richness inference with traditional methods (Fig. 2B, S6-S8, S11).  
359 When spurious taxa accumulations are comparable across contrasted experimental groups, no  
360 such confounding arises (Fig. S9-S10). Our empirical analyses indicate that such an assumption  
361 is too strong for making differential richness inferences at lower taxonomic levels (e.g., genus-  
362 specific) of a microbial assemblage (Fig. 2B).

363  
364 **Relaxing microbiome richness comparisons to taxonomic groups:** Microbiome analyses  
365 frequently restrict richness comparisons to the entire microbial assemblage obtained in study  
366 samples (sample-wide richness inference). From the perspective of deriving health and ecological  
367 indicators based on community assemblages, analysis of a community's finer organization levels  
368 is equally interesting<sup>2,8,10-12,17</sup>. Our genus-wise differential richness results (Section 2.3) indicate  
369 that contrasting richness for taxonomic sub-groups can enable practically useful inferences and  
370 add interesting dimensions to microbiome state space descriptions.

371  
372 **Within-genus taxa accumulation structure and the trend estimator:** Our results document  
373 reliable across-genera regularity in the patterns of within-genus taxa accumulations, across many  
374 studies and genus-specific experiments (Fig. 2-3, S1-S3, Tables 1-2, S2-S3). We speculate that  
375 genus abundances, in contrast to sampling depth, more accurately track the sampling rate of false  
376 sequence variation in 16S surveys for at least two reasons. First, commonly exploited 16S rRNA  
377 target segments are limited in resolution beyond genus level<sup>37-44</sup>. Second, genus recovered

378 abundances, unlike total sampling depth, normalize for the sampling rates of distinct genera. This  
379 restricts us from mixing taxa accumulation statistics over truly disparate input biological  
380 sequences from distinct genera, while allowing us to preserve any systematic genus specific  
381 effects. We used a robust trend estimate of the within-genus taxa accumulation data to model  
382 spurious taxa accumulation (Methods, Fig. 2-3, S1-S3). The coherent accumulation of a large  
383 number of detected taxa translated to low estimation uncertainties. These curves were not  
384 necessarily linear in the recovered genus abundances (Fig. S1-S3). The systematic genus-  
385 specific contributions to this trend can arise due to between-genera variation in both detectable  
386 true input sequence diversity (copy number<sup>43</sup> or number of distinct cell types) and 16S sequencing  
387 noise<sup>56,57</sup>.

388  
389 **Abundance dependent control in bioinformatic sequence analysis:** Beyond differential  
390 richness inference, there is a need for recovered abundance dependent control in other  
391 (meta)genomic sequence analyses e.g., sequencing read mapping and taxonomic annotation,  
392 which exploit fixed sequence similarity thresholds. Probabilistic methods have a natural  
393 incorporation of abundance in clustering/mapping decisions. In all cases however, poor error  
394 models would continue to drive false taxa accumulations. It must be noted that we have not  
395 analyzed false negative rates in this study<sup>59,60</sup>.

396  
397 **Limitations of differential richness inference** Observed (and reportedly, asymptotic<sup>61</sup>) richness  
398 estimates cannot forecast crossing over of species accumulation curves that can in principle occur  
399 with additional sampling effort. However, differential analysis of both these estimates over realized  
400 sampling effort is still useful for detecting perturbations to the evenness of a biological  
401 community<sup>58,62</sup>, and is thus effective for deriving predictors of individual and environmental health.

402  
403 **Future work.** There are several avenues for future research. First, an integrated estimation  
404 procedure of false taxa accumulation rates and differential richness fold changes would lead to  
405 more appropriate p-values under the assumed statistical models. Second, development of  
406 ecological richness estimators in the presence of species misclassifications would be a valuable  
407 addition to the literature. Supplementary Note 2 considers a simple but a useful special case.  
408 Third, 16S surveys on mixtures of microbial species with varied relatedness and controlled input  
409 richness levels, would enable a joint characterization of detectable 16S resolution, taxa  
410 reconstruction algorithms and richness estimators. Fourth, control for multiple testing over tree  
411 structured hypotheses can be incorporated if one wishes to automate hypothesis testing over taxa  
412 collections defined by subtrees of a taxonomic tree<sup>63,64</sup>. Finally, all our empirical observations  
413 were based on a set of 16S surveys that operate over partial 16S gene targets. Because full  
414 length 16S surveys also involve amplification, and sequencing protocols<sup>41</sup>, we expect the  
415 qualitative nature of our results to generalize to such surveys, perhaps at a lower taxonomic level  
416 (e.g., species), and this can be explored.

417  
418 Taken together, this paper significantly clarifies the dynamics of spurious discovery accumulation  
419 in 16S surveys, presents strategies for modeling their generation, demonstrates the need to  
420 control for the observed false discoveries in microecological surveys while deriving differential  
421 richness inferences, and offers a flexible practical solution to achieve the same.

## 422 4. Methods

### 423 Prokounter

424 Our proposed procedure for differential richness inference works in two steps. A control for false  
425 taxa accumulation is established first. The estimated control is subsequently exploited within  
426 standard generalized linear models for differential richness inference.

427 Let  $n_{gj}$  denote the reconstructed number of taxa for genus  $g$  in sample  $j$ ,  $y_{gj}$  denote the  
428 corresponding recovered abundance (i.e., genus's total count in the sample), and  $\tau$  represent the  
429 sample depth.

430 Let  $f_t(\log y_{gj})$  indicate the logged technical contribution to taxa accumulation for a given genus  
431 and its recovered abundance level. This function is used to model the log of the expected false  
432 taxa accumulation. Its estimate  $\hat{f}_t(\log y_{gj})$  is obtained using within-genus taxa accumulation data  
433 as follows.

434 **Estimating the technical contribution  $\hat{f}_t$ .** We explored two strategies to estimate a robust  
435 within-genus accumulation trend.

436 A semi-parameteric smoothing spline model is assumed on  $z_{gj} = \log n_{gj}$ ,

$$437 z_{gj}|g, y_{gj} = \eta(g, y_{gj}) + \varepsilon_{gj} = \kappa + f_R(\log y_{gj}) + f_G(g) + f_{GR}(g, \log y_{gj}) + \varepsilon_{gj} \quad (1)$$

438 with  $\varepsilon_{gj} \sim N(0, \sigma^2)$ , and appropriate side conditions are placed on  $f(\cdot)$  (Chapters 2-3<sup>65</sup>). Here  $\kappa$   
439 and  $f_R(\cdot)$  denote the intercept and recovered abundance dependent components;  $f_G$  and  
440  $f_{GR}$  indicate the genus and its respective interaction functions with the recovered genus  
441 abundance.

442 Briefly,  $\eta$  is estimated as a unique solution to the penalized optimization problem:  $\hat{\eta} =$   
443  $\arg \min_{h \in H} l(h | \tilde{y}, x) + \lambda J(h)$ , where  $l(\cdot | \tilde{y}, x)$  is the negative log likelihood,  $\lambda$  is a  
444 regularization parameter and  $J(\cdot)$  is a roughness penalty that penalizes overfitting of  $h$  to the data.  
445 The specification of  $J(\cdot)$  involves, in part, integrals of squared second order derivatives of the  
446 estimand over the range of  $\log y_{gj}$ , thereby enforcing smoothness. Supplementary Note 4 offers  
447 more details on the model construction and an exact correspondence to example 2.7 in Gu<sup>81</sup>.  
448 Numerical optimization is performed using the R package *gss*<sup>65</sup>. Supplementary figures S2 and  
449 S18 offer examples of the fits that result.

450 The technical contribution to taxa growth is estimated as  $\hat{f}_t(g, \log y_{gj}) = \kappa + \hat{f}_R(\log y_{gj}) + \hat{f}_G(g)$ .  
451 Only the significant genus effects are retained after multiple testing correction with the Benjamini-  
452 Hochberg procedure. When the genera contributions are null or similar, as we observed  
453 empirically in several datasets (e.g., Fig. S9, S10),  $\hat{f}_t(g, \log y_{gj}) \propto \hat{f}_R(\log y_{gj})$ .

454 The latter observation inspires the following alternative strategy: estimate  $\hat{f}_t(\cdot)$  as a net average

455 within-genus accumulation curve using the *loess* smoother. Both options are made available in  
456 our software. As expected, inferences arising and the results in tables 1-2 are similar with both  
457 approaches. Fig. S3 offers examples of the fitted trends. The spline strategy does offer better  
458 control in the presence of systematic genus effects (Fig. S18).

459 For consistency, in this paper, we have chosen the spline strategy.

460 The fitted  $\hat{f}_t$  can be used to control for false taxa accumulation in standard differential richness  
461 inference procedures. In *Prokounter*, we incorporate it through the models presented below.

462 **Differential richness inference** We use Greek letters to indicate regression parameters. A  $\cdot$  in  
463 the subscript indicates vectorizing over the subscript.  $X$  denotes the experimental design matrix.  
464 Genus-specific, sample-wide and taxa collection models are presented in equations (2)-(4)  
465 below. In each case, given the quantity modeled, reasonable transformations of the estimated  
466 logged technical contribution,  $\hat{f}_t$ , based on eqn. (1), are used. Terms involving  $X$  below can be  
467 viewed to approximate the effects arising from genus-recovered abundance interaction terms  
468 from eqn. (1).

469 Genus-specific differential richness inference the conditional mean of the observed richness is  
470 modeled through the link:

$$471 \log E[n_{gj} | y_{g\cdot}, X, f_t(\cdot)] = X_j^T \mu_g + \nu_g f_t(\log y_{gj}) \quad (2)$$

472 where the right hand side is an approximate form for the log of the conditional expectation of the  
473 right hand side of eqn. (1).

474 Sample-wide differential richness inference For inference across sample groups, we posit:

$$475 \log E[n_{+j} | y_{g\cdot}, X, f_t(\cdot)] = X_j^T \zeta + \gamma \log \sum_{g:y_{gj}>0} e^{f_t(\log y_{gj})} \quad (3)$$

476 where the  $+$  indicates summation over a subscript. As in eqn.(2) the right hand side of eqn.(3) is  
477 an approximate form for the log of the conditional expectation of the right hand side of eqn.(1),  
478 now summed over  $g$ . The net sample-wide technical contribution is modeled as a simple sum of  
479 the technical contributions from the genera detected in the sample. Although eqn.(3) does not  
480 immediately arise from eqn.(2), we find the simplicity and emphasis on dominant contributors to  
481 the sum, the more abundant genera, appealing. In addition, we often find that  $\nu_g \approx 1$  and  $\gamma \approx 1$  in  
482 applications.

483 Differential richness inference for arbitrary collections of genera For an arbitrary taxonomic group  
484  $k$  (e.g., phyla), with a set of member genera  $G_k$ , we assume :

$$485 \log E[n_{kj} | y_{g\cdot}, X, f_t(\cdot)] = X_j^T \psi_k + \gamma_k \log \sum_{g \in G_k \cap y_{gj}>0} e^{f_t(\log y_{gj})} \quad (4)$$

486 As with the sample-wide model, here too we have modeled the sample-wide technical contribution  
487 for each collection  $k$  based on the sum of genus-level technical contributions, but now restricted

488 only to those genera considered within the collection.

489 Keeping to the traditional theme of continuous Poisson mixtures driving sample-wide species  
490 accumulations, we chose Negative Binomial variance functions when performing sample-wide  
491 inferences, and Poisson variance functions for genus-specific richness inferences. For the several  
492 studies considered here, the estimated overdispersion coefficients for sample-wide Negative  
493 Binomial models were in the range of  $10^{-3}$  to  $10^{-1}$ . For well expressed genera, inferences and  
494 model diagnostics were not sensitive to the two distribution assumptions. Parameter estimation  
495 and inference on the regression parameters  $\mu_g$ ,  $\zeta$  and  $\psi_k$  were performed using R's *glm* function.  
496 Maximum likelihood estimation with iteratively reweighted least squares converges rapidly in  
497 about ten iterations or less. Speaking to the explanatory power of  $\hat{f}_t$ , as implied by tables 1-2, the  
498 residual deviance is often small, on the order of the residual degrees of freedom. To gauge  
499 reproducibility of inferences over fitted  $\hat{f}_t(\cdot)$ , confidence intervals based on the bootstrap  $t^{66}$  are  
500 also available for the regression coefficients of the sample-wide differential richness inference  
501 model.

502 The above models, which were used to generate the results in the applications section, exploit  
503 observed richness as response variables and are therefore non-asymptotic in nature. In the  
504 several 16S surveys considered here, asymptotic genus-wise and sample-wide richness  
505 estimates heavily tracked their respective observed richness values (97-100% Pearson  
506 correlations, Figs. S13-S17). We therefore propose the same regression models above for  
507 standard inverse variance weighted regression analyses of asymptotic richness estimates. As  
508 expected, results from such a procedure were similar to those obtained with observed richness  
509 as the response variable. Also see reference<sup>26</sup> for a heterogeneity test of potential interest.

510 We implement these procedures in an R package *Prokounter*. Supplementary Note 2 presents  
511 further discussions on the regression models above.

## 512 **Package and code availability:**

513 The R package *Prokounter* is available from the link: <https://github.com/mskb01/prokounter>

514 Code for the paper is available from the link : <https://github.com/mskb01/prokounterPaper>

515 **Richness estimators and differential analyses:** Estimates and standard errors for  
516 Chao1 and ACE estimators were calculated using the R package *vegan*<sup>67</sup>. Breakaway estimates  
517 and standard errors were obtained using the R package *Breakaway*. Differential richness  
518 inferences corresponding to the three estimators were obtained with the R package *Betta*<sup>26</sup>.  
519 Rarefaction based interpolated and extrapolated richness estimates and standard errors were  
520 obtained using the package *iNext*<sup>68</sup>. The R package *doParallel*<sup>69</sup> was used for several parallel  
521 computing tasks.

522 The following datasets and study design variables were used to construct design matrices for  
523 sample-wide and genus-specific differential analyses reported in the applications section.

524 1. *Hydrocephalus*<sup>50</sup> (PIH100 FST97) - Control and Case.

- 525 2. Wastewater<sup>51</sup> (WW FST99) - Influent, Effluent, Before UV treatment, After UV treatment,  
526 Pond storage, and Inlet to pumphouse for subsequent spray irrigation.  
527 3. MBQC, Handling lab B (MBQC-HLB) - Gut mock, Oral mock, the rest of the stool samples  
528 were typed as Other.  
529 4. Time series study<sup>2</sup> (TS FST97, Donor B) - based on the original study, three time windows  
530 were established to define sample groups: days up to to 150 were categorized as *pre-*  
531 *infection*, days from 151 upto 159 as *infection*, and days post 159 were typed as *post-*  
532 *infection*.  
533 5. Pseudomonas dilution study (Pseudomonas FST97) - number of cycles and logged  
534 number of input Pseudomonas cells.

535 **Dilution experiment:** A monoisolate was prepared overnight from a Luria-Bertani (LB) agar  
536 plate into a 5 mL LB liquid, which grew to 10<sup>9</sup> cells. A ten fold serial dilution of cells from 10<sup>5</sup> to 10  
537 cells in phosphate buffer saline (PBS) was generated. DNA was isolated, 16S amplified and  
538 sequencing libraries were prepared as previously described<sup>50</sup>. Briefly, DNA was isolated using  
539 the Zymbiomics DNA miniprep kit following manufacturers protocol with bead beating and  
540 proteinase K treatment. For 16S amplification, primer-extension polymerase chain reaction (PE-  
541 PCR) of the V1-V2 region was performed using an M13 tagged 336R universal primer as  
542 previously described<sup>70</sup> and amplification cycles were varied. Briefly, target DNA was mixed with a  
543 10 µl of 10X buffer, and annealed with M13 tagged 336R by first heating to 95°C and then cooling  
544 to 40°C slowly. The annealed product was extended using Klenow polymerase (5U/µl and primers  
545 digested with 20U/µl Exo I (NEB, USA), then amplified with 500 nM primers (805R and M13)  
546 using the MolTaq 16S Mastermix (Molzym GmbH & Co Kg, Germany). Library preparation was  
547 done with the Hyper Prep Kit (KAPA Biosystems, USA) following the manufacturer's protocol and  
548 libraries were sequenced on MiSeq using the 600 cycle v3 kit.

549  
550 **16S datasets and taxa reconstruction pipelines:** The mouse microbiome 16S data  
551 was obtained from the R/Bioconductor package *metagenomeSeq*<sup>71</sup>. The moderate to severe  
552 diarrheal 16S survey was obtained from the R/Bioconductor package *msd16S*<sup>72</sup>. The long-term  
553 time series 16S survey<sup>2</sup> was obtained from the supplementary data of the corresponding paper.  
554 The wastewater 16S survey<sup>51</sup> was obtained on request from the authors of the original study.  
555 MBQC handling laboratory B's (HL-B) sequencing reads was obtained from the Microbiome  
556 Quality Control (MBQC) project<sup>27</sup>.

557  
558 We generated three varieties of taxa count data from each of the *Pseudomonas*, *PIH100* 16S and  
559 MBQC *HL-B* (*handling lab B*) sequencing data. These include sequence similarity threshold  
560 based taxa clustering methods for 99% and 97% sequence similarities (*Qiime1*), and a  
561 probabilistic taxa clustering method (*Dada2*) as follows.

562  
563 **Quality filtering of sequencing reads:** Paired-end reads were processed with *Trimmomatic*<sup>73</sup>  
564 (v0.38) to remove universal adapters and low-quality reads. Reads with ambiguous bases were  
565 removed or truncated using *Dada2's filterAndTrim*<sup>74</sup> function. The 16S V1-V2 regions in both our  
566 *Pseudomonas* and *PIH100* data were sequenced using 2x300bp paired-end reads. Based on  
567 sequencing read quality score profiles, we retained the first 240bp and 210bp in the forward and



568 reverse reads for the *Pseudomonas* dataset. These numbers were respectively 200bp and 190bp  
569 for *PIH100*. For HL-B, we removed the first 2bp following the primers in the forward and reverse  
570 reads. This allowed us to neglect the trailing low quality bases adversely affecting the taxa  
571 reconstructions, while still allowing for sufficient overlap to merge paired-end reads.

572 Reads with either the designed primers or their reverse complements were filtered using  
573 *cutadapt*<sup>75</sup>. The quality filtered reads were then clustered with Qiime1<sup>76</sup> and Dada2<sup>74</sup> as below.

574

575 **Qiime 1** : Quality filtered forward and reverse reads were merged using *Pear*<sup>77</sup>, and then clustered  
576 using *pick\_open\_reference\_otus.py* (*Qiime1* version 1.9.1), which implements the Qiime1 open  
577 reference OTU clustering algorithm. Briefly, closed reference clustering of merged reads were  
578 performed against the *Silva132* database at 97% and 99% sequence similarity thresholds, using  
579 *Uclust*<sup>78</sup> v.1.2.22q . Reads that did not map to the database were subsampled and used as new  
580 centroids for a *de novo* OTU clustering step at the respective sequence similarity thresholds.  
581 Remaining unmapped reads were subsequently close clustered against the *de novo* OTUs.  
582 Finally, another step of *de novo* clustering was performed on the remaining unmapped reads.  
583 Taxonomy was assigned to taxa representative sequences with *Uclust* based on the *Silva132*<sup>79</sup>  
584 database . These sequences were filtered with *Pynast*<sup>80</sup>, and OTU tables generated.

585

586 **Dada2**: Dada2 allows denoising forward and the reverse reads independently. Error rates were  
587 estimated separately for the quality filtered forward and reverse reads for each sample. This  
588 estimation step is based on a sample of reads for computational tractability. Reads were  
589 deduplicated and sequence clusters inferred based on the estimated error rates. Taxa from  
590 forward and reverse reads were merged at the end of the workflow. Chimeric taxa were removed  
591 with the function *removeChimeraDenovo*. The resulting taxa were assigned taxonomic labels  
592 based on the *Silva132* database, using their naïve Bayes classifier.

593 **Acknowledgements**

594 This project was supported by an NIH Director's Transformative Award 1R01AI145057. We thank  
595 the Genome Science Facility at the Penn State University College of Medicine for performing the  
596 sequencing for the *Pseudomonas* dilution study.

597 **Figures**

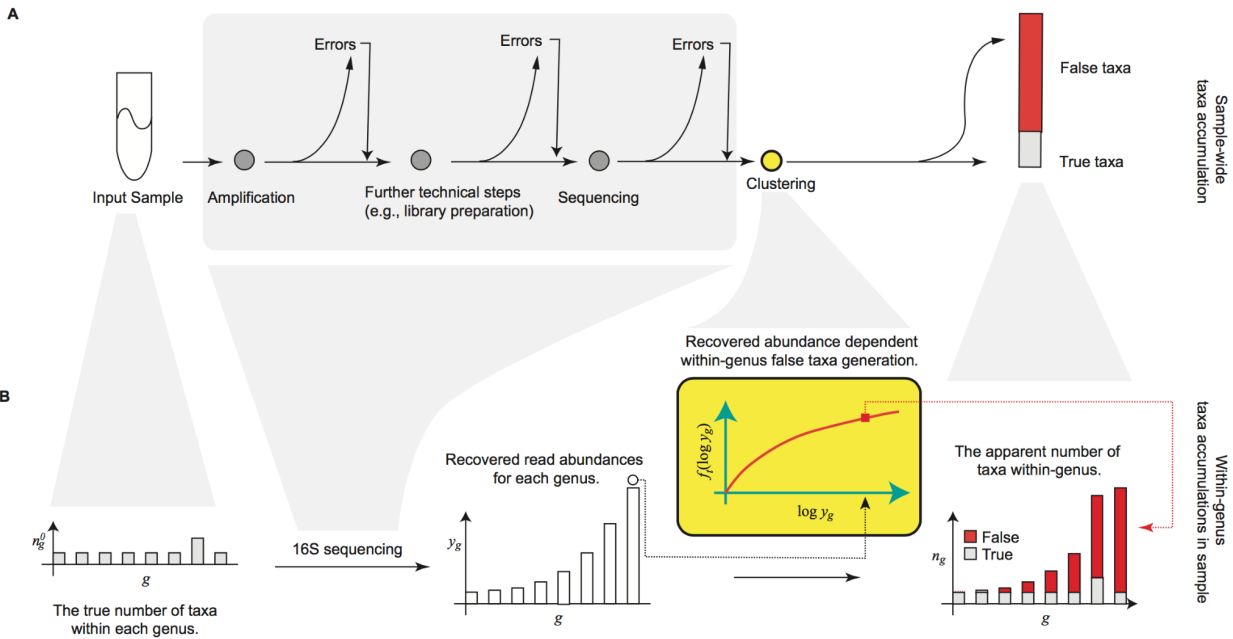

598  
 599 **Figure 1. Within-genus false taxa accumulation structure.** (A) Sequences in input samples  
 600 are subjected to various technical steps during 16S sequencing (gray shade). The output reads  
 601 from 16S sequencing are clustered for sequence similarity using a methodology of choice. Of the  
 602 number of taxa (clusters) thus reconstructed, some are true, i.e., equal in sequence to those in  
 603 the input sample, the rest are spurious i.e., false (red). (B) For every genus, the accumulation is  
 604 determined as a function of its recovered abundances. Notation:  $n_g^0$  the respective true number  
 605 of taxa associated (true richness),  $y_g$  the genus recovered abundance,  $f_t(\cdot)$  the abundance  
 606 dependent technical component driving false taxa accumulations within-genus.

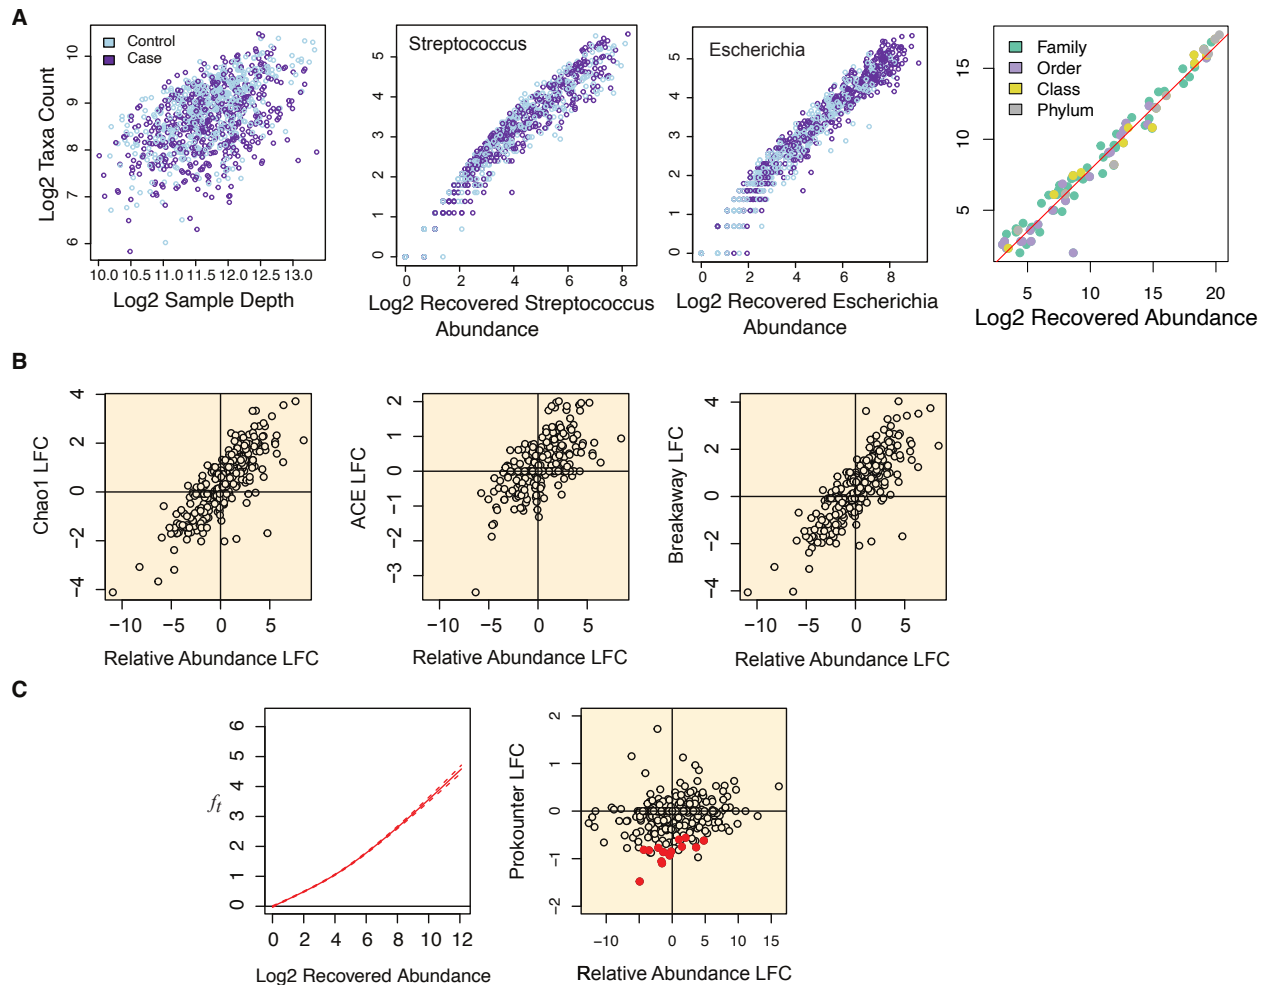

607  
 608 **Figure 2. Concordant taxa accumulations across genera, confounded differential richness**  
 609 **inference and the Prokounter strategy.** (A) Sample-wide taxa accumulations are visualized  
 610 with respect to sample depth (left). Within-genus taxa accumulations are visualized with respect  
 611 to the total recovered genus abundances for two genera, i.e., the sum of the abundances of all  
 612 taxa within the genus (center). Dataset-wide taxa accumulations for any taxonomic level is  
 613 strongly predicted by recovered abundance alone (right). Red line illustrates a linear fit. (B)  
 614 Differential richness log-fold changes (LFC, y-axis) track differential relative abundance fold  
 615 changes (LFC, x-axis) in the waste-water treatment survey. (C) Prokounter exploits within-genus  
 616 accumulation data to model false taxa accumulation rates. When exploited in a standard Poisson  
 617 regression setting, the resulting differential richness fold changes are uncorrelated with genus-  
 618 wide differential abundance statistics (right). Dashed lines represent confidence intervals. Points  
 619 colored in red are the genus-specific differential richness inferences for the waste-water treatment  
 620 survey.

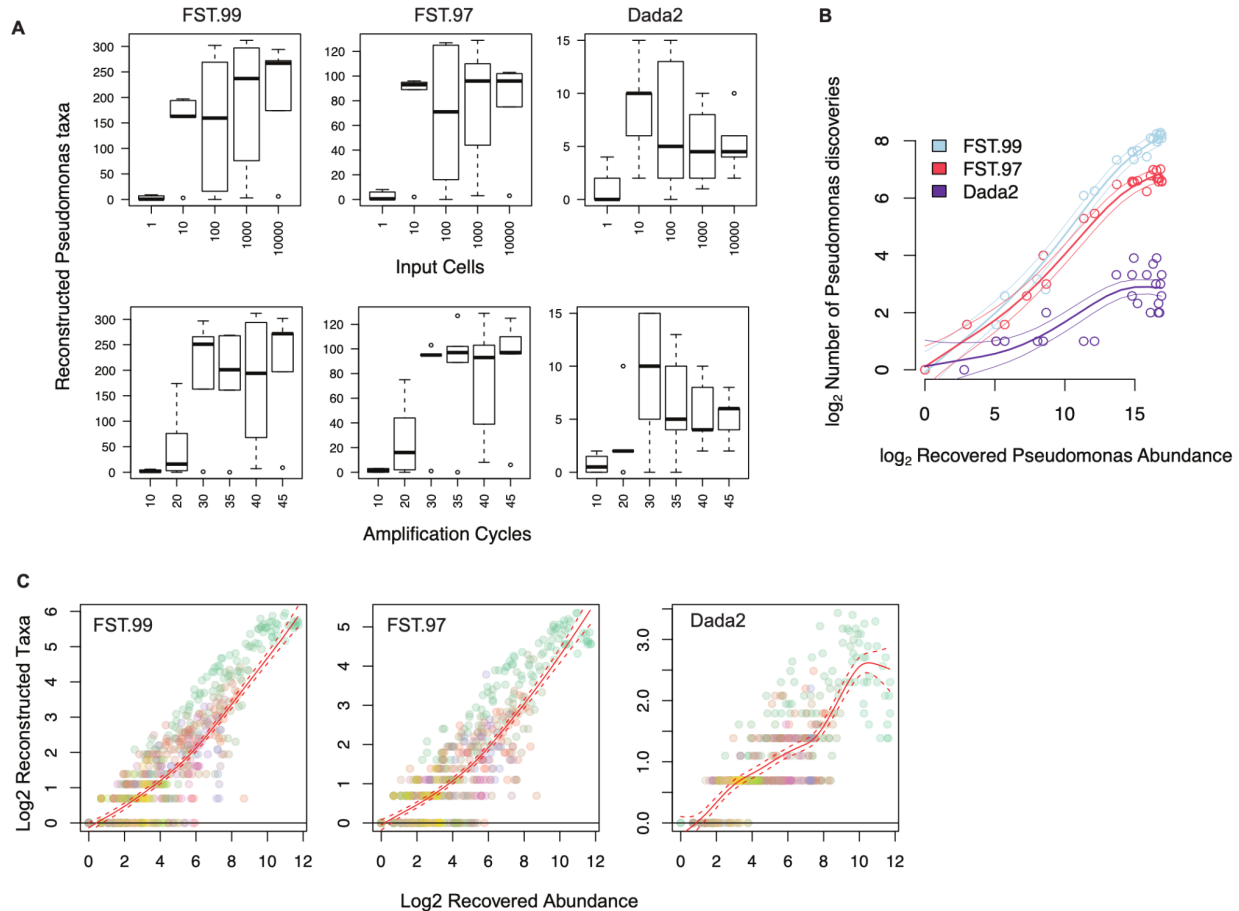

621  
622 **Figure 3. False microbial discoveries accumulate along the recovered abundance axis in**  
623 **the Pseudomonas dilution study.** (A) For each taxa clustering method, the observed variation  
624 in within-genus Pseudomonas taxa accumulations are driven by experimental and technical  
625 parameters. Contaminant Pseudomonas are expected to fall with input loads, indicating false  
626 discovery accumulations at higher recovered Pseudomonas abundances. (B) The genus  
627 recovered abundance axis offers a succinct representation for taxa accumulations. Average and  
628 the 95% point-wise confidence intervals for the logged within-Pseudomonas taxa accumulation  
629 trends are shown with colored lines for each method, with colored circles indicating the respective  
630 observations. (C) An overlay of taxa accumulations across multiple detected genera in the study.  
631 Colors indicate genera.

## 632 Tables

| Dataset                       | Year | 16S segment, Sequencing& Clustering | Pseudo $R^2_{trend}$ | Pseudo $R^2_{trend+design}$ | $AIC_{trend}$        | $AIC_{trend+design}$ |
|-------------------------------|------|-------------------------------------|----------------------|-----------------------------|----------------------|----------------------|
| Mouse [59, 60]                | 2009 | V2, 454, FST.97                     | 96.82%               | 98.68%                      | $1.250 \times 10^4$  | $1.0273 \times 10^4$ |
| Diarrhea [1]                  | 2014 | V12, 454, FST.99                    | 98.52%               | 98.96%                      | $1.2323 \times 10^5$ | $1.1455 \times 10^5$ |
| Time series [2]               | 2014 | V4, GAIIx, FST.97                   | 94.43%               | 98.46%                      | $3.9401 \times 10^4$ | $3.0813 \times 10^4$ |
| Wastewater [48]               | 2018 | V34, MiSeq, FST.99                  | 91.70%               | 95.51%                      | $3.7400 \times 10^4$ | $2.3682 \times 10^4$ |
| MBQC-HLB <sup>(97)</sup> [27] | 2017 | V4, MiSeq, FST.97                   | 97.15%               | 98.66%                      | $1.0710 \times 10^5$ | $9.2275 \times 10^4$ |
| MBQC-HLB <sup>(99)</sup> [27] | 2017 | V4, MiSeq, FST.99                   | 98.67%               | 99.29%                      | $1.089 \times 10^5$  | $9.6674 \times 10^4$ |
| MBQC-HLB <sup>(D)</sup> [27]  | 2017 | V4, MiSeq, Dada2                    | 61.03%               | 81.72%                      | $3.82 \times 10^4$   | $3.3877 \times 10^4$ |
| PIH100 <sup>(97)</sup> [47]   | 2020 | V12, MiSeq, FST.97                  | 94.04%               | 97.32%                      | $1.5740 \times 10^4$ | $1.3858 \times 10^4$ |
| PIH100 <sup>(99)</sup> [47]   | 2020 | V12, MiSeq, FST.99                  | 97.66%               | 98.90%                      | $1.7351 \times 10^4$ | $1.5739 \times 10^4$ |
| PIH100 <sup>(D)</sup> [47]    | 2020 | V12, MiSeq, Dada2                   | 88.37%               | 91.01%                      | $8.8630 \times 10^3$ | $9.0263 \times 10^3$ |
| Pseudomonas <sup>(97)</sup>   | 2021 | V12, MiSeq, FST.97                  | 97.49%               | 98.92%                      | $3.0762 \times 10^3$ | $2.8235 \times 10^3$ |
| Pseudomonas <sup>(99)</sup>   | 2021 | V12, MiSeq, FST.99                  | 98.71%               | 99.46%                      | $3.3810 \times 10^3$ | $3.0717 \times 10^3$ |
| Pseudomonas <sup>(D)</sup>    | 2021 | V12, MiSeq, Dada2                   | 89.26%               | 93.77%                      | 1881.62              | 1889.10              |

633

634 **Table 1: Relative to study variables, within-genus taxa accumulation trends capture bulk**  
635 **of the systematic variation in 16S surveys' genus-specific taxa accumulations.** For each  
636 16S survey dataset mentioned in column 1, the year of publication is listed in column 2, the partial  
637 16S segment targeted, machine technology and sequence clustering approach used are specified  
638 in column 3. FST.x refers to sequence clustering at an a priori fixed sequence similarity threshold  
639 of x%. McFadden's pseudo- $R^2$  for explaining genus-specific taxa accumulations with two  
640 negative binomial regressions (NB) are listed in columns 4 and 5. The fourth column is obtained  
641 when the NB regression includes within-genus taxa accumulation trend ( $\hat{f}_R(\cdot)$ , Methods) alone as  
642 predictor. The fifth column additionally includes the genus identifier, total sample depth, and  
643 experimental design matrix for each dataset as predictors (methods). Corresponding Akaike  
644 Information Criteria (AIC) are listed in columns 6 and 7.

| Dataset                       | Year | 16S segment, Sequencing& Clustering | Pseudo $R^2_{trend}$ | Pseudo $R^2_{trend+design}$ | $AIC_{trend}$        | $AIC_{trend+design}$ |
|-------------------------------|------|-------------------------------------|----------------------|-----------------------------|----------------------|----------------------|
| Mouse [59, 60]                | 2009 | V2, 454, FST.97                     | 99.91%               | 99.92%                      | $1.2971 \times 10^3$ | $1.2853 \times 10^3$ |
| Diarrhea [1]                  | 2014 | V12, 454, FST.99                    | 99.94%               | 99.94%                      | $1.2508 \times 10^4$ | $1.2406 \times 10^4$ |
| Time series [2]               | 2014 | V4, GAIIx, FST.97                   | 99.95%               | 99.95%                      | $2.0972 \times 10^3$ | $1.9238 \times 10^3$ |
| Wastewater [48]               | 2018 | V34, MiSeq, FST.99                  | 99.96%               | 99.97%                      | $6.7384 \times 10^2$ | $6.3222 \times 10^2$ |
| MBQC-HLB <sup>(97)</sup> [27] | 2017 | V4, MiSeq, FST.97                   | 99.98%               | 99.99%                      | $2.5052 \times 10^3$ | $2.4587 \times 10^3$ |
| MBQC-HLB <sup>(99)</sup> [27] | 2017 | V4, MiSeq, FST.99                   | 99.992%              | 99.993%                     | $2.7456 \times 10^3$ | $2.6955 \times 10^3$ |
| MBQC-HLB <sup>(D)</sup> [27]  | 2017 | V4, MiSeq, Dada2                    | 99.86%               | 99.03%                      | $1.6748 \times 10^3$ | $1.5003 \times 10^3$ |
| PIH100 <sup>(97)</sup> [47]   | 2020 | V12, MiSeq, FST.97                  | 98.96%               | 99.07%                      | $1.2430 \times 10^3$ | $1.1989 \times 10^3$ |
| PIH100 <sup>(99)</sup> [47]   | 2020 | V12, MiSeq, FST.99                  | 99.94%               | 99.95%                      | $1.4471 \times 10^3$ | $1.3988 \times 10^3$ |
| PIH100 <sup>(D)</sup> [47]    | 2020 | V12, MiSeq, Dada2                   | 99.73%               | 99.73%                      | $9.8011 \times 10^2$ | $9.8415 \times 10^2$ |
| Pseudomonas <sup>(97)</sup>   | 2021 | V12, MiSeq, FST.97                  | 99.94%               | 99.95%                      | $3.0641 \times 10^2$ | $2.8237 \times 10^2$ |
| Pseudomonas <sup>(99)</sup>   | 2021 | V12, MiSeq, FST.99                  | 99.97%               | 99.98%                      | $3.1263 \times 10^2$ | $2.9741 \times 10^2$ |
| Pseudomonas <sup>(D)</sup>    | 2021 | V12, MiSeq, Dada2                   | 99.83%               | 99.84%                      | $1.8723 \times 10^2$ | $1.9202 \times 10^2$ |

645

646 **Table 2: Relative to study variables, within-genus taxa accumulation trends capture bulk**  
647 **of the systematic variation in 16S surveys' sample-wide taxa accumulations.** For each 16S  
648 survey dataset mentioned in column 1, the year of publication is listed in column 2, the partial 16S  
649 segment targeted, machine technology and sequence clustering approach used are specified in  
650 column 3. FST.x refers to sequence clustering at an a priori fixed sequence similarity threshold  
651 of x%. McFadden's pseudo- $R^2$  for explaining sample-wide taxa accumulations with two negative  
652 binomial regressions (NB) are listed in columns 4 and 5. The fourth column is obtained when the  
653 NB regression includes within-genus taxa accumulation trend ( $\hat{f}_R(\cdot)$ , Methods) alone as predictor.  
654 The fifth column additionally includes the total sample depth, and experimental design matrix for  
655 each dataset as predictors (methods). Corresponding Akaike Information Criteria (AIC) are listed  
656 in columns 6 and 7.

## 657 **References**

- 658 1. Pop, M. *et al.* Diarrhea in young children from low-income countries leads to large-scale  
659 alterations in intestinal microbiota composition. *Genome Biol.* **15**, R76 (2014).
- 660 2. David, L. A. *et al.* Host lifestyle affects human microbiota on daily timescales. *Genome Biol.*  
661 **15**, 1–15 (2014).
- 662 3. Kostic, A. D. *et al.* The Dynamics of the Human Infant Gut Microbiome in Development and  
663 in Progression toward Type 1 Diabetes. *Cell Host Microbe* **17**, 260–273 (2015).
- 664 4. Riquelme, E. *et al.* Tumor Microbiome Diversity and Composition Influence Pancreatic  
665 Cancer Outcomes. *Cell* **178**, 795–806.e12 (2019).
- 666 5. Nejman, D. *et al.* The human tumor microbiome is composed of tumor type–specific  
667 intracellular bacteria. *Science* **368**, 973–980 (2020).
- 668 6. Poore, G. D. *et al.* Microbiome analyses of blood and tissues suggest cancer diagnostic  
669 approach. *Nature* **579**, 567–574 (2020).
- 670 7. Magurran, A. E. *Ecological Diversity and Its Measurement*. (Princeton University Press,  
671 1988).
- 672 8. Magurran, A. E. & McGill, B. J. *Biological diversity: frontiers in measurement and*  
673 *assessment*. (Oxford University Press, 2011).
- 674 9. Hooper, D. U. *et al.* A global synthesis reveals biodiversity loss as a major driver of  
675 ecosystem change. *Nature* **486**, 105–108 (2012).
- 676 10. Purvis, A. & Hector, A. Getting the measure of biodiversity. *Nature* **405**, 212–219 (2000).
- 677 11. Fleishman, E., Noss, R. F. & Noon, B. R. Utility and limitations of species richness metrics  
678 for conservation planning. *Ecol. Indic.* **6**, 543–553 (2006).
- 679 12. Adams, W. M., Small, R. D. S. & Vickery, J. A. The impact of land use change on migrant  
680 birds in the Sahel. *Biodiversity* **15**, 101–108 (2014).
- 681 13. Hallmann, C. A., Foppen, R. P. B., van Turnhout, C. A. M., de Kroon, H. & Jongejans, E.  
682 Declines in insectivorous birds are associated with high neonicotinoid concentrations.



- 683 *Nature* 511, 341–343 (2014).
- 684 14. Stanton, R. L., Morrissey, C. A. & Clark, R. G. Analysis of trends and agricultural drivers of  
685 farmland bird declines in North America: A review. *Agric. Ecosyst. Environ.* 254, 244–254  
686 (2018).
- 687 15. Inger, R. *et al.* Common European birds are declining rapidly while less abundant species'  
688 numbers are rising. *Ecol. Lett.* 18, 28–36 (2015).
- 689 16. Sambell, C. E., Holland, G. J., Haslem, A. & Bennett, A. F. Diverse land-uses shape new  
690 bird communities in a changing rural region. *Biodivers. Conserv.* 28, 3479–3496 (2019).
- 691 17. Spellerberg, I. F. *Monitoring Ecological Change*. (Cambridge University Press, 2005).  
692 doi:10.1017/CBO9780511614699.
- 693 18. Adams, J. *Species richness: patterns in the diversity of life*. (Springer Science & Business  
694 Media, 2010).
- 695 19. Ozbudak, E. M., Thattai, M., Kurtser, I., Grossman, A. D. & Van Oudenaarden, A.  
696 Regulation of noise in the expression of a single gene. *Nat. Genet.* 31, 69–73 (2002).
- 697 20. McFall-Ngai, M. *et al.* Animals in a bacterial world, a new imperative for the life sciences.  
698 *Proc. Natl. Acad. Sci.* 110, 3229–3236 (2013).
- 699 21. Redford, K. H., Segre, J. A., Salafsky, N., Rio, C. M. del & McAloose, D. Conservation and  
700 the Microbiome. *Conserv. Biol.* 26, 195–197 (2012).
- 701 22. Jiménez, R. R. & Sommer, S. The amphibian microbiome: natural range of variation,  
702 pathogenic dysbiosis, and role in conservation. *Biodivers. Conserv.* 26, 763–786 (2017).
- 703 23. West, A. G. *et al.* The microbiome in threatened species conservation. *Biol. Conserv.* 229,  
704 85–98 (2019).
- 705 24. Gotelli, N. J. & Colwell, R. K. Quantifying biodiversity: procedures and pitfalls in the  
706 measurement and comparison of species richness. *Ecol. Lett.* 4, 379–391 (2001).
- 707 25. Gotelli, N. J. & Colwell, R. K. Estimating species richness. 16.
- 708 26. Willis, A., Bunge, J. & Whitman, T. Improved detection of changes in species richness in

- 709 high diversity microbial communities. *J. R. Stat. Soc. Ser. C Appl. Stat.* 66, 963–977 (2017).
- 710 27. Sinha, R. *et al.* Assessment of variation in microbial community amplicon sequencing by the  
711 Microbiome Quality Control (MBQC) project consortium. *Nat. Biotechnol.* 35, 1077–1086  
712 (2017).
- 713 28. Chao, A. & Chiu, C.-H. Species Richness: Estimation and Comparison. in *Wiley StatsRef:*  
714 *Statistics Reference Online* 1–26 (American Cancer Society, 2016).  
715 doi:10.1002/9781118445112.stat03432.pub2.
- 716 29. Chao, A. Nonparametric Estimation of the Number of Classes in a Population. *Scand. J.*  
717 *Stat.* 11, 265–270 (1984).
- 718 30. Bunge, J. & Fitzpatrick, M. Estimating the Number of Species: A Review. *J. Am. Stat.*  
719 *Assoc.* 88, 364–373 (1993).
- 720 31. Bent, S. J. & Forney, L. J. The tragedy of the uncommon: understanding limitations in the  
721 analysis of microbial diversity. *ISME J.* 2, 689–695 (2008).
- 722 32. Kunin, V., Engelbrekton, A., Ochman, H. & Hugenholtz, P. Wrinkles in the rare biosphere:  
723 pyrosequencing errors can lead to artificial inflation of diversity estimates. *Environ.*  
724 *Microbiol.* 12, 118–123 (2010).
- 725 33. Huse, S. M., Welch, D. M., Morrison, H. G. & Sogin, M. L. Ironing out the wrinkles in the rare  
726 biosphere through improved OTU clustering. *Environ. Microbiol.* 12, 1889–1898 (2010).
- 727 34. Schloss, P. D. Reintroducing mothur: 10 Years Later. *Appl. Environ. Microbiol.* 86, (2020).
- 728 35. Chiu, C.-H. & Chao, A. Estimating and comparing microbial diversity in the presence of  
729 sequencing errors. *PeerJ* 4, e1634 (2016).
- 730 36. Willis, A. Species richness estimation with high diversity but spurious singletons. (2016).
- 731 37. Fox, G. E., Wisotzkey, J. D. & Jurtshuk JR, P. How close is close: 16S rRNA sequence  
732 identity may not be sufficient to guarantee species identity. *Int. J. Syst. Evol. Microbiol.* 42,  
733 166–170 (1992).
- 734 38. Janda, J. M. & Abbott, S. L. 16S rRNA Gene Sequencing for Bacterial Identification in the

- 735 Diagnostic Laboratory: Pluses, Perils, and Pitfalls. *J. Clin. Microbiol.* 45, 2761–2764 (2007).
- 736 39. Knight, R. *et al.* Best practices for analysing microbiomes. *Nat. Rev. Microbiol.* 16, 410–422  
737 (2018).
- 738 40. Hillmann, B. *et al.* Evaluating the Information Content of Shallow Shotgun Metagenomics.  
739 *mSystems* 3, (2018).
- 740 41. Johnson, J. S. *et al.* Evaluation of 16S rRNA gene sequencing for species and strain-level  
741 microbiome analysis. *Nat. Commun.* 10, 5029 (2019).
- 742 42. Yarza, P. *et al.* Uniting the classification of cultured and uncultured bacteria and archaea  
743 using 16S rRNA gene sequences. *Nat. Rev. Microbiol.* 12, 635–645 (2014).
- 744 43. Větrovský, T. & Baldrian, P. The variability of the 16S rRNA gene in bacterial genomes and  
745 its consequences for bacterial community analyses. *PLoS One* 8, e57923 (2013).
- 746 44. Poretsky, R., Rodriguez-R, L. M., Luo, C., Tsementzi, D. & Konstantinidis, K. T. Strengths  
747 and Limitations of 16S rRNA Gene Amplicon Sequencing in Revealing Temporal Microbial  
748 Community Dynamics. *PLOS ONE* 9, e93827 (2014).
- 749 45. Harris, B. Determining bounds on integrals with applications to cataloging problems. *Ann.*  
750 *Math. Stat.* 521–548 (1959).
- 751 46. Gelman, A. Struggles with Survey Weighting and Regression Modeling. *Stat. Sci.* 22,  
752 (2007).
- 753 47. Fisher, R. A., Corbet, A. S. & Williams, C. B. The Relation Between the Number of Species  
754 and the Number of Individuals in a Random Sample of an Animal Population. *J. Anim. Ecol.*  
755 12, 42–58 (1943).
- 756 48. Chao, A. & Lee, S.-M. Estimating the Number of Classes via Sample Coverage. *J. Am. Stat.*  
757 *Assoc.* 87, 210–217 (1992).
- 758 49. Willis, A. & Bunge, J. Estimating diversity via frequency ratios. *Biometrics* 71, 1042–1049  
759 (2015).
- 760 50. Paulson, J. N. *et al.* Paenibacillus infection with frequent viral coinfection contributes to

- 761 postinfectious hydrocephalus in Ugandan infants. *Sci. Transl. Med.* 12, (2020).
- 762 51. Kulkarni, P. *et al.* Conventional wastewater treatment and reuse site practices modify  
763 bacterial community structure but do not eliminate some opportunistic pathogens in  
764 reclaimed water. *Sci. Total Environ.* 639, 1126–1137 (2018).
- 765 52. Degnan, P. H. & Ochman, H. Illumina-based analysis of microbial community diversity.  
766 *ISME J.* 6, 183–194 (2012).
- 767 53. Pinto, A. J. & Raskin, L. PCR biases distort bacterial and archaeal community structure in  
768 pyrosequencing datasets. (2012).
- 769 54. Schloss, P. D., Gevers, D. & Westcott, S. L. Reducing the effects of PCR amplification and  
770 sequencing artifacts on 16S rRNA-based studies. *PLoS One* 6, e27310 (2011).
- 771 55. Haas, B. J. *et al.* Chimeric 16S rRNA sequence formation and detection in Sanger and 454-  
772 pyrosequenced PCR amplicons. *Genome Res.* 21, 494–504 (2011).
- 773 56. Schloss, P. D. & Westcott, S. L. Assessing and Improving Methods Used in Operational  
774 Taxonomic Unit-Based Approaches for 16S rRNA Gene Sequence Analysis. *Appl. Environ.*  
775 *Microbiol.* 77, 3219–3226 (2011).
- 776 57. Sze, M. A. & Schloss, P. D. The Impact of DNA Polymerase and Number of Rounds of  
777 Amplification in PCR on 16S rRNA Gene Sequence Data. *mSphere* 4, (2019).
- 778 58. Hughes, J. B., Hellmann, J. J., Ricketts, T. H. & Bohannan, B. J. M. Counting the  
779 Uncountable: Statistical Approaches to Estimating Microbial Diversity. *Appl. Environ.*  
780 *Microbiol.* 67, 4399–4406 (2001).
- 781 59. Olson, N. D. *et al.* A framework for assessing 16S rRNA marker-gene survey data analysis  
782 methods using mixtures. *Microbiome* 8, 1–18 (2020).
- 783 60. Prodan, A. *et al.* Comparing bioinformatic pipelines for microbial 16S rRNA amplicon  
784 sequencing. *PLOS ONE* 15, e0227434 (2020).
- 785 61. Haegeman, B. *et al.* Robust estimation of microbial diversity in theory and in practice. *ISME*  
786 *J.* 7, 1092–1101 (2013).

- 787 62. Flather, C. Fitting species–accumulation functions and assessing regional land use impacts  
788 on avian diversity. *J. Biogeogr.* 23, 155–168 (1996).
- 789 63. Goeman, J. J. & Finos, L. The inheritance procedure: multiple testing of tree-structured  
790 hypotheses. *Stat. Appl. Genet. Mol. Biol.* 11, (2012).
- 791 64. Meijer, R. J. & Goeman, J. J. A multiple testing method for hypotheses structured in a  
792 directed acyclic graph. *Biom. J.* 57, 123–143 (2015).
- 793 65. Gu, C. *Smoothing spline ANOVA models*. (Springer, 2002).
- 794 66. Gu, C. *Smoothing spline ANOVA models*. vol. 297 (Springer Science & Business Media,  
795 2013).
- 796 67. DiCiccio, T. J. & Efron, B. Bootstrap confidence intervals. *Stat. Sci.* 11, 189–228 (1996).
- 797 68. Oksanen, J. *et al.* The vegan package. *Community Ecol. Package* 10, 719 (2007).
- 798 69. Hsieh, T. C., Ma, K. H. & Chao, A. iNEXT: an R package for rarefaction and extrapolation of  
799 species diversity (Hill numbers). *Methods Ecol. Evol.* 7, 1451–1456 (2016).
- 800 70. Weston, S. & Calaway, R. Getting Started with doParallel and foreach. *Vignette CRAN URL*  
801 957, (2019).
- 802 71. Chang, S.-S., Hsu, H.-L., Cheng, J.-C. & Tseng, C.-P. An efficient strategy for broad-range  
803 detection of low abundance bacteria without DNA decontamination of PCR reagents. *PLoS*  
804 *One* 6, e20303 (2011).
- 805 72. Paulson, J. N. *et al.* *metagenomeSeq: Statistical analysis for sparse high-throughput*  
806 *sequencing*. (Bioconductor version: Release (3.13), 2021).  
807 doi:10.18129/B9.bioc.metagenomeSeq.
- 808 73. Paulson, J. N., Bravo, H. C., Pop, M. & biocViews ExperimentData, S. Package ‘msd16s’.  
809 (2015).
- 810 74. Bolger, A. M., Lohse, M. & Usadel, B. Trimmomatic: a flexible trimmer for Illumina sequence  
811 data. *Bioinformatics* 30, 2114–2120 (2014).
- 812 75. Callahan, B. J. *et al.* DADA2: high-resolution sample inference from Illumina amplicon data.

- 813 *Nat. Methods* (2016).
- 814 76. Martin, M. Cutadapt removes adapter sequences from high-throughput sequencing reads.
- 815 *EMBnet J.* 17, 10–12 (2011).
- 816 77. Caporaso, J. G. *et al.* QIIME allows analysis of high-throughput community sequencing
- 817 data. *Nat. Methods* 7, 335–336 (2010).
- 818 78. Zhang, J., Kobert, K., Flouri, T. & Stamatakis, A. PEAR: a fast and accurate Illumina Paired-
- 819 End reAd mergeR. *Bioinformatics* 30, 614–620 (2014).
- 820 79. Edgar, R. C. Search and clustering orders of magnitude faster than BLAST. *Bioinforma. Oxf.*
- 821 *Engl.* 26, 2460–2461 (2010).
- 822 80. Quast, C. *et al.* The SILVA ribosomal RNA gene database project: improved data
- 823 processing and web-based tools. *Nucleic Acids Res.* 41, D590–D596 (2013).
- 824 81. Caporaso, J. G. *et al.* PyNAST: a flexible tool for aligning sequences to a template
- 825 alignment. *Bioinformatics* 26, 266–267 (2010).

826

827

828

829

830

831

832
